# Supplementary material for: The kidney hepcidin/ferroportin axis controls iron reabsorption and determines the magnitude of kidney and systemic iron overload
Source: PubMed Central journal article supplement (PMC8456337; doi:10.1016/j.kint.2021.04.034), 2021-09
Supplement: mmc1.pdf [file mmc1.pdf]

## Supplemental Figure 1

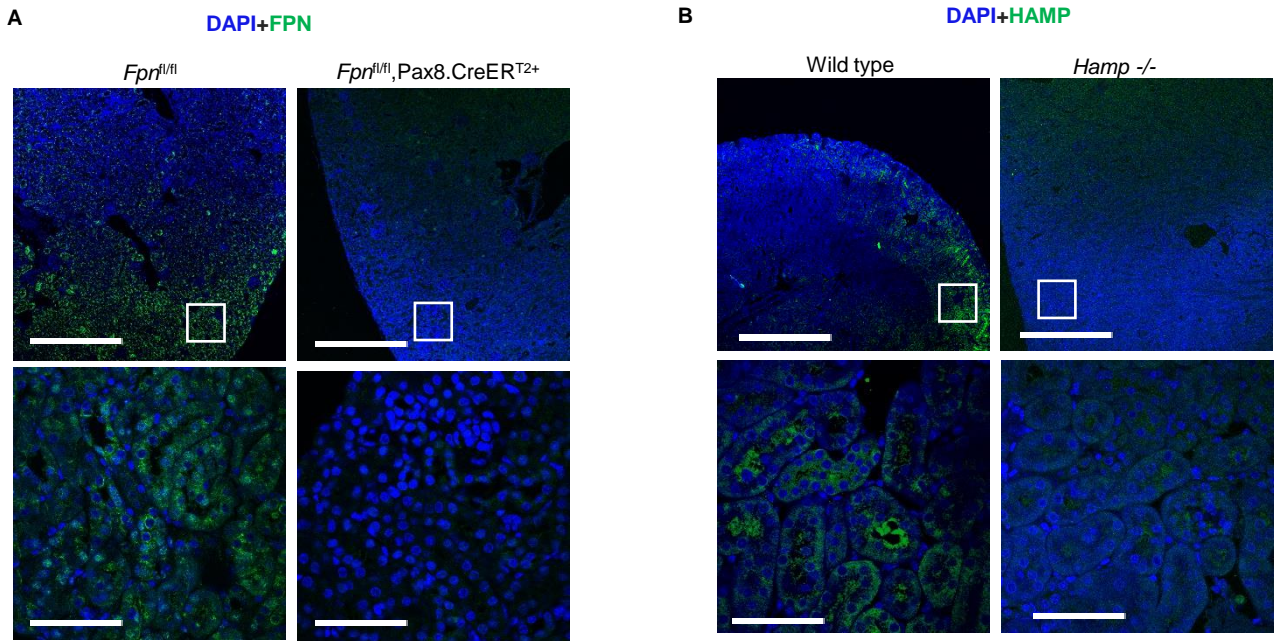

### Supplemental figure 1-Confirmation of FPN and HAMP antibody specificity

- A. Representative images of FPN immuno-fluorescent staining in the renal cortex of *Fpn<sup>fl/fl</sup>, Pax8.CreER<sup>T2+</sup>* animals and *Fpn<sup>fl/fl</sup>* controls at 3 months of age. Top panels, scale bar=200 $\mu$ m, original magnification x10. Lower panels, scale bar=25 $\mu$ m, original magnification x60.
- B. Representative images of HAMP immuno-fluorescent staining in the renal cortex of *Hamp<sup>-/-</sup>* animals and wild type controls at 3 months of age. Top panels, scale bar=200 $\mu$ m, original magnification x10. Lower panels, scale bar=25 $\mu$ m, original magnification x60.

# Supplemental Figure 2

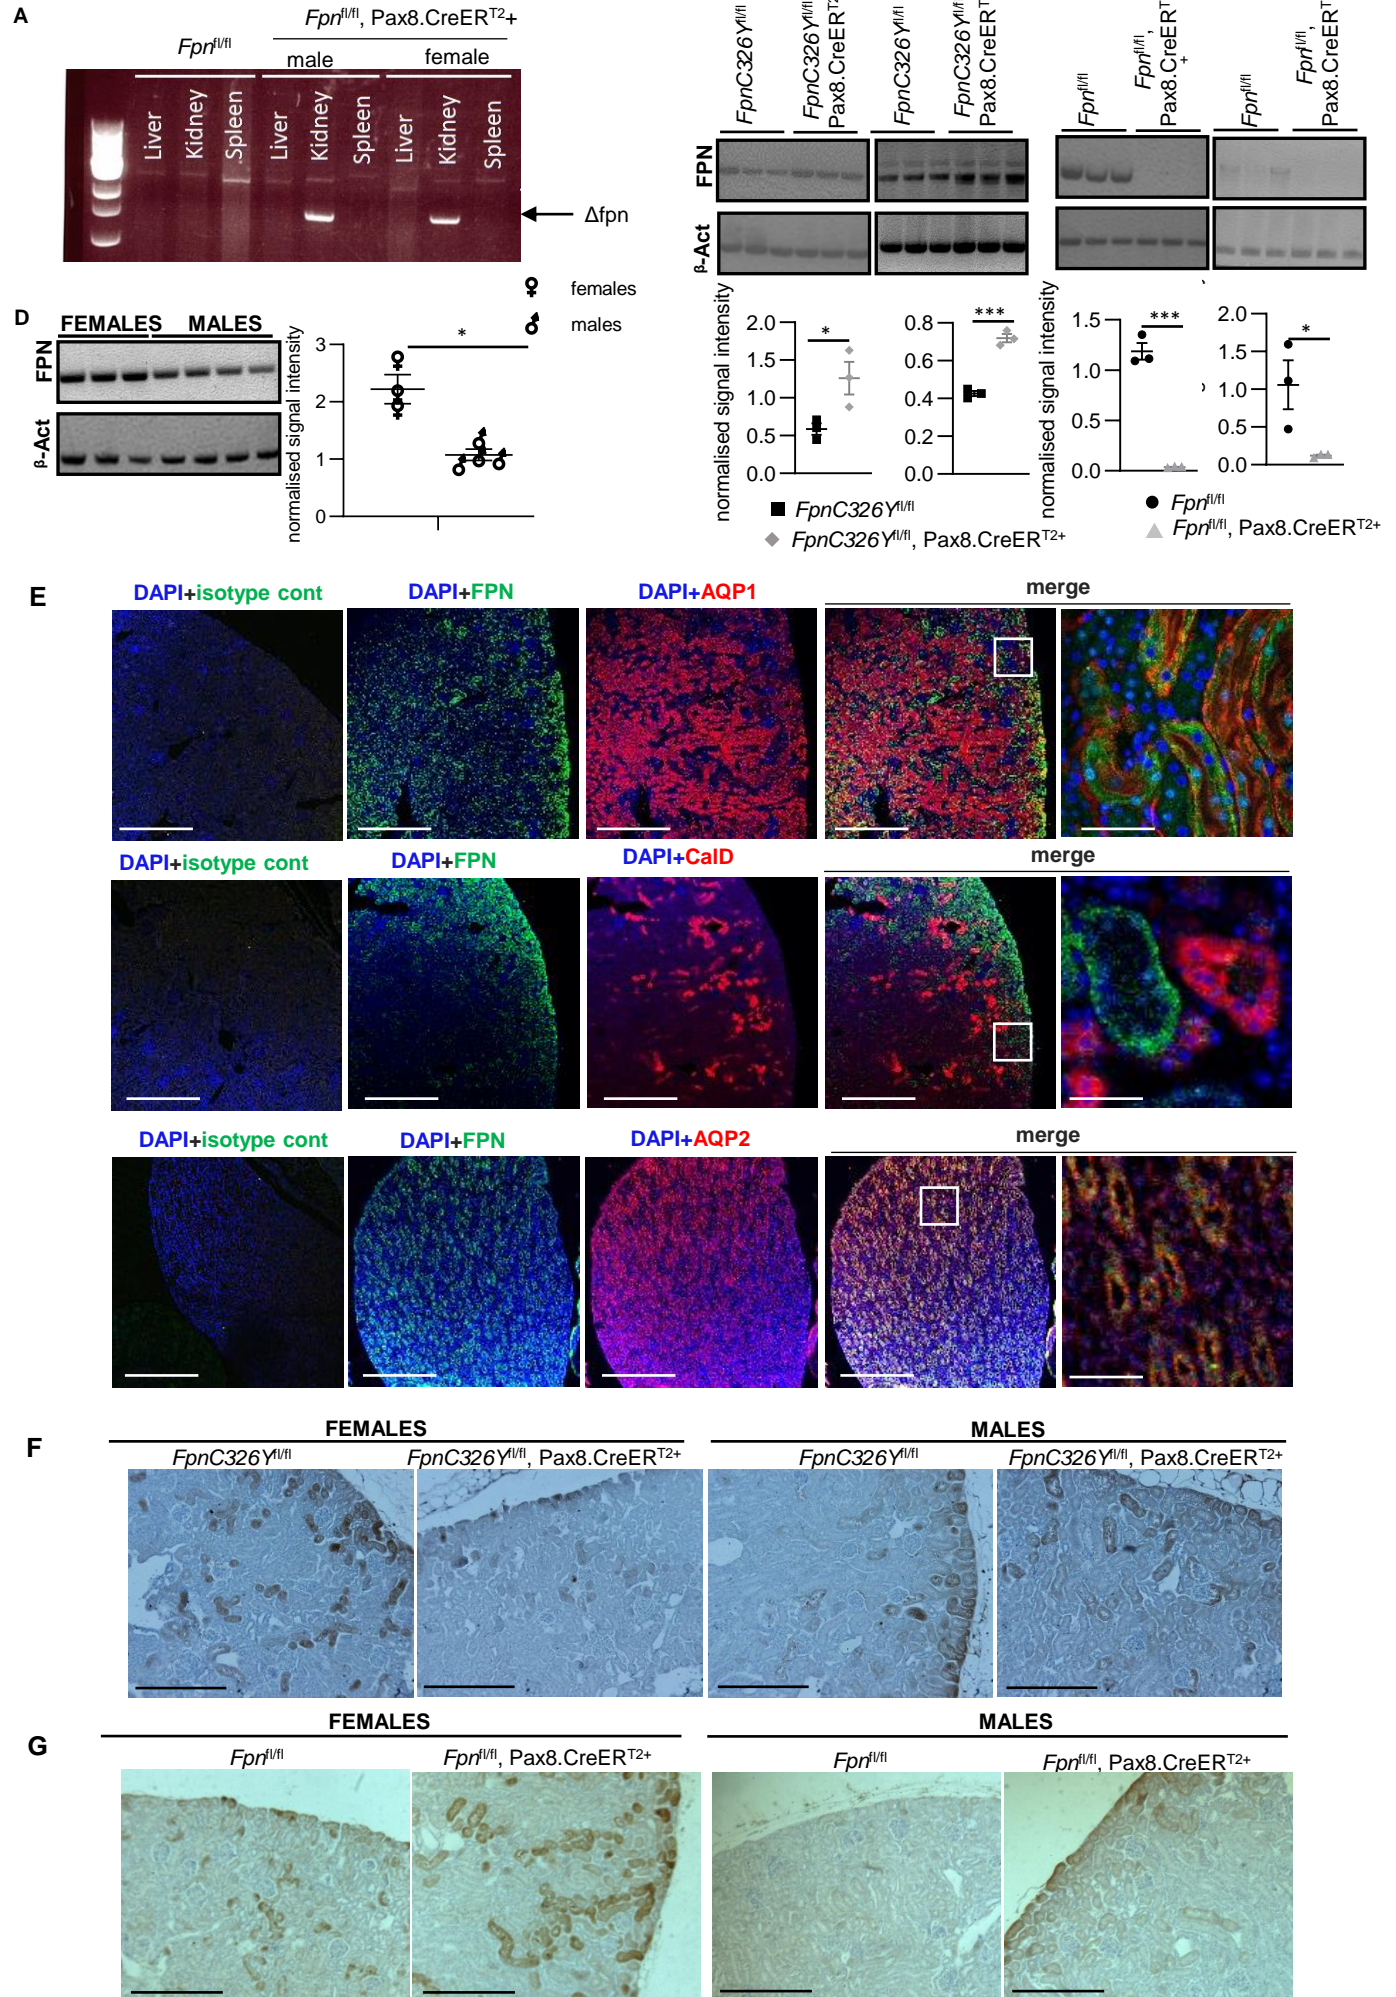

## Supplemental Figure 2- Confirmation of Pax8.CreER<sup>T2+</sup> activity and specificity

- A. Genotyping of *Fpn<sup>fl/fl</sup>* and *Fpn<sup>fl/fl</sup>, Pax8.CreER<sup>T2+</sup>* mice using genomic DNA extracted from the liver, spleen and kidney at 1 week post tamoxifen induction.
  - B. Western Blot for FPN in kidneys of female and male *FpnC326Y<sup>fl/fl</sup>, Pax8.CreER<sup>T2+</sup>* mice and *FpnC326Y<sup>fl/fl</sup>* controls at 3 months post-tamoxifen treatment. Quantitation of signal intensity shown in bottom panel.
  - C. Western Blot for FPN in kidneys of female and male *Fpn<sup>fl/fl</sup>, Pax8.CreER<sup>T2+</sup>* mice and *Fpn<sup>fl/fl</sup>* controls at 3 months post-tamoxifen treatment. Quantitation of signal intensity shown in bottom panel.
  - D. Western Blot for FPN in kidneys of wild type females and male littermates at 3 months of age. Quantitation of signal intensity shown in bottom panel.
- E-G. Larger versions of panels Fig1A, 1G and 1E respectively.

Values are shown as mean± standard error of the mean. \*p<0.05, \*\*\*p<0.001.

## Supplemental Figure 3

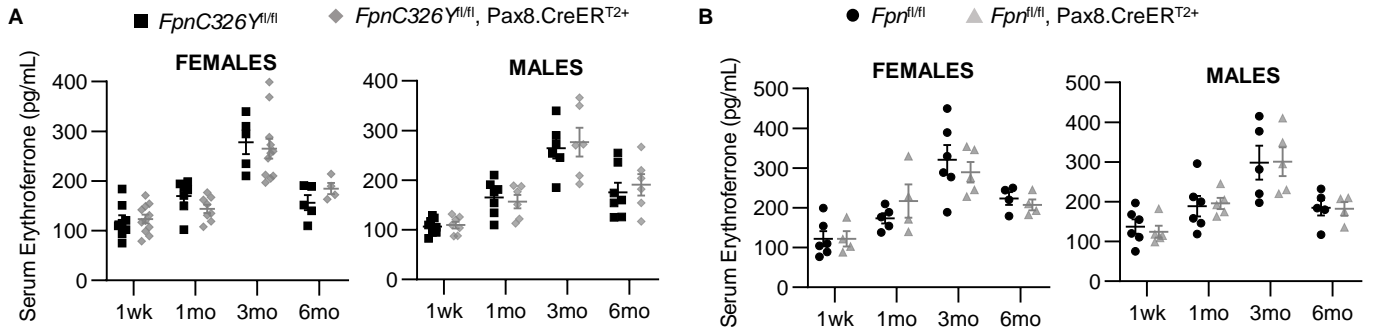

### Supplemental figure 3- Serum erythroferrone levels are not altered in *FpnC326Y<sup>fl/fl</sup>, Pax8.CreER<sup>T2+</sup>* and *Fpn<sup>fl/fl</sup>, Pax8.CreER<sup>T2+</sup>* mice.

**A.** Serum erythroferrone levels in female and male *FpnC326Y<sup>fl/fl</sup>, Pax8.CreER<sup>T2+</sup>* mice and *FpnC326Y<sup>fl/fl</sup>* controls at 1 week, 1 month, 3 months and 6 months post-tamoxifen treatment.

**B.** Serum erythroferrone levels in female and male *Fpn<sup>fl/fl</sup>, Pax8.CreER<sup>T2+</sup>* mice and *Fpn<sup>fl/fl</sup>* controls at 1 week, 1 month, 3 months and 6 months post-tamoxifen induction. Values are shown as mean ± standard error of the mean.

## Supplemental Figure 4

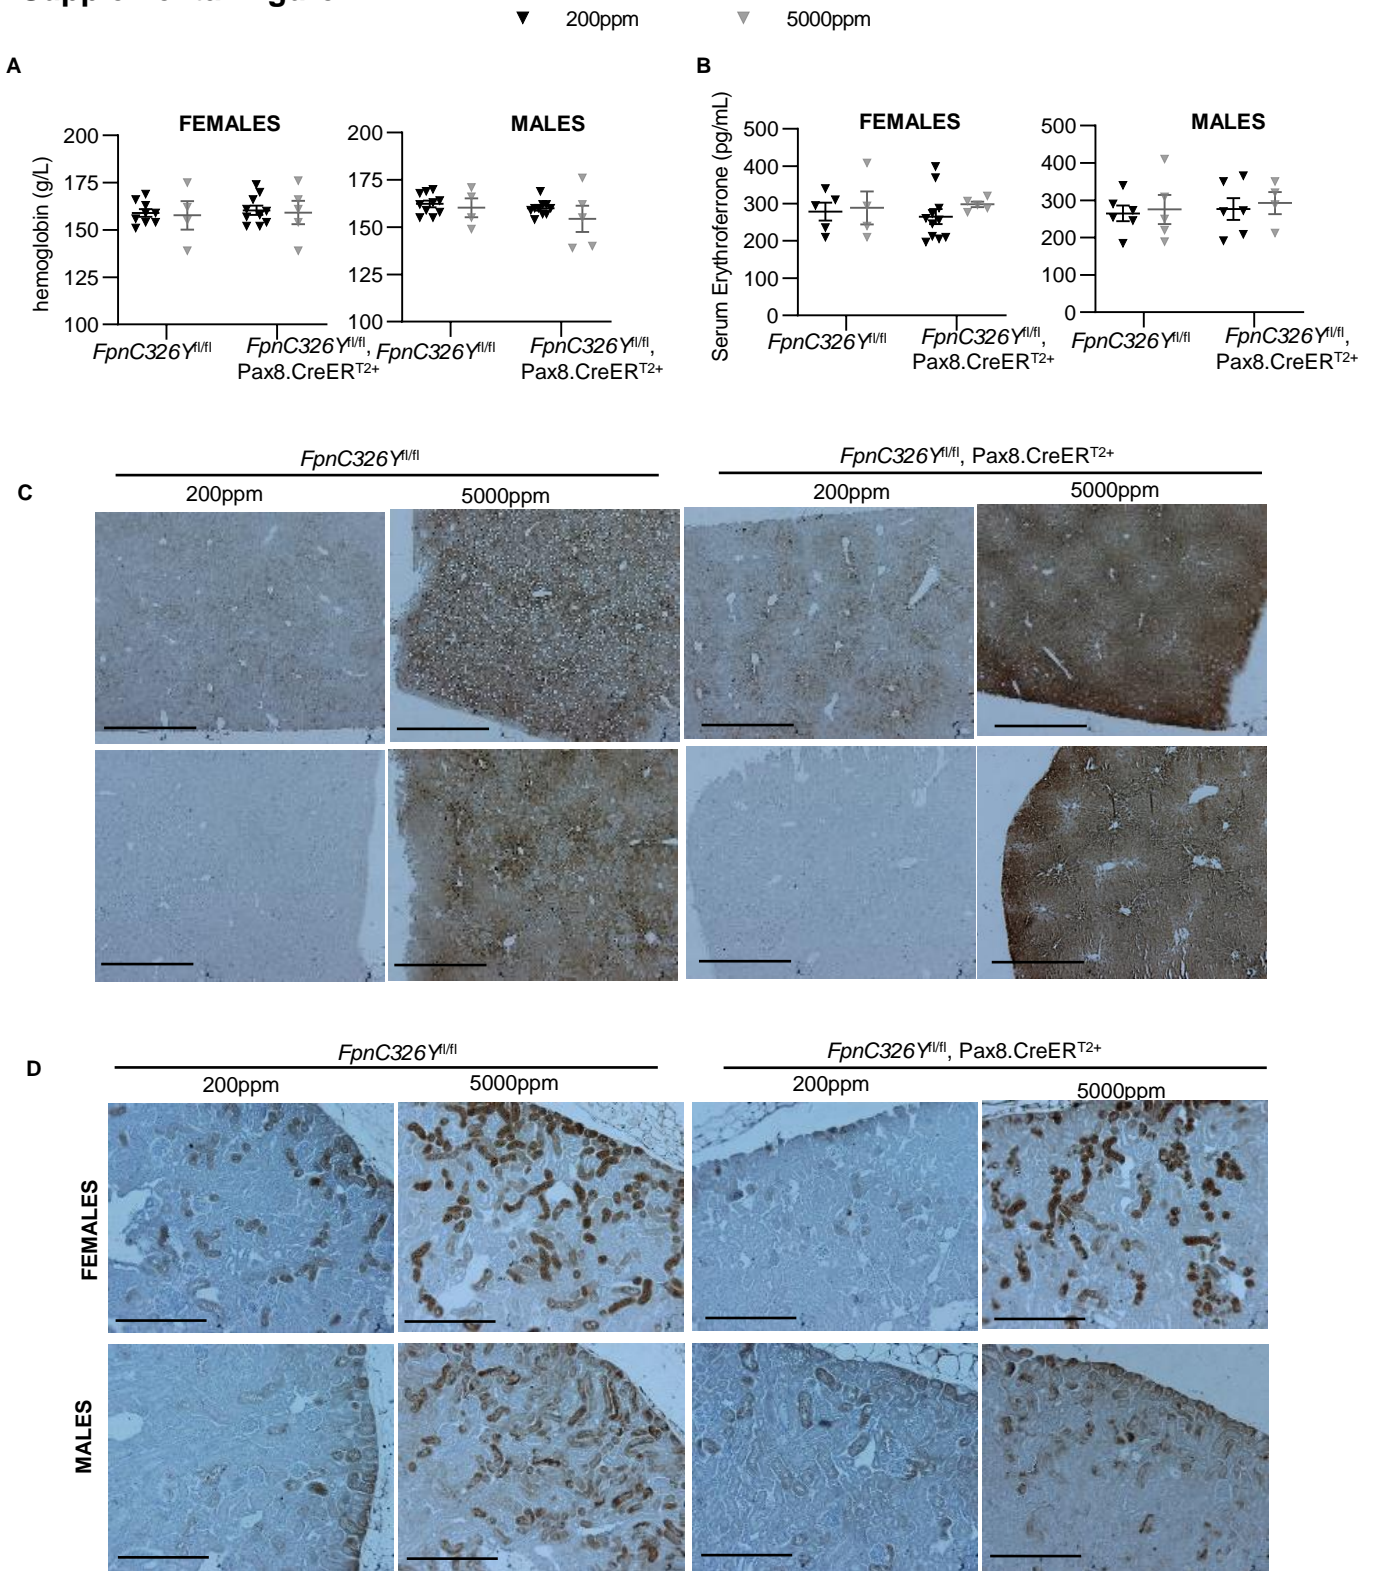

### Supplemental figure 4- Haemoglobin and serum erythroferrone levels are not altered in *FpnC326Y<sup>fl/fl</sup>, Pax8.CreER<sup>T2+</sup>* fed an iron-loaded diet.

- A. Haemoglobin levels in female and male *FpnC326Y<sup>fl/fl</sup>, Pax8.CreER<sup>T2+</sup>* mice and *FpnC326Y<sup>fl/fl</sup>* controls fed either a control diet (containing 200ppm iron) or an iron-loaded diet (containing 5000ppm iron) from weaning for 3 months.
- B. Serum erythroferrone levels in female and male *FpnC326Y<sup>fl/fl</sup>, Pax8.CreER<sup>T2+</sup>* mice and *FpnC326Y<sup>fl/fl</sup>* controls fed either a control diet (containing 200ppm iron) or an iron-loaded diet (containing 5000ppm iron) from weaning for 3 months.
- Values are shown as mean ± standard error of the mean.
- C-D. Larger versions of panels Fig3H and 3I respectively.

# Supplemental Figure 5

● *Fpn*<sup>wt/wt</sup> female ○ *Fpn*<sup>wt/wt</sup> male ● *Fpn*<sup>wt/C326Y</sup> female ○ *Fpn*<sup>wt/C326Y</sup> male ▼ 200ppm female ▼ 200ppm male ▼ 5000ppm female ▼ 5000ppm male

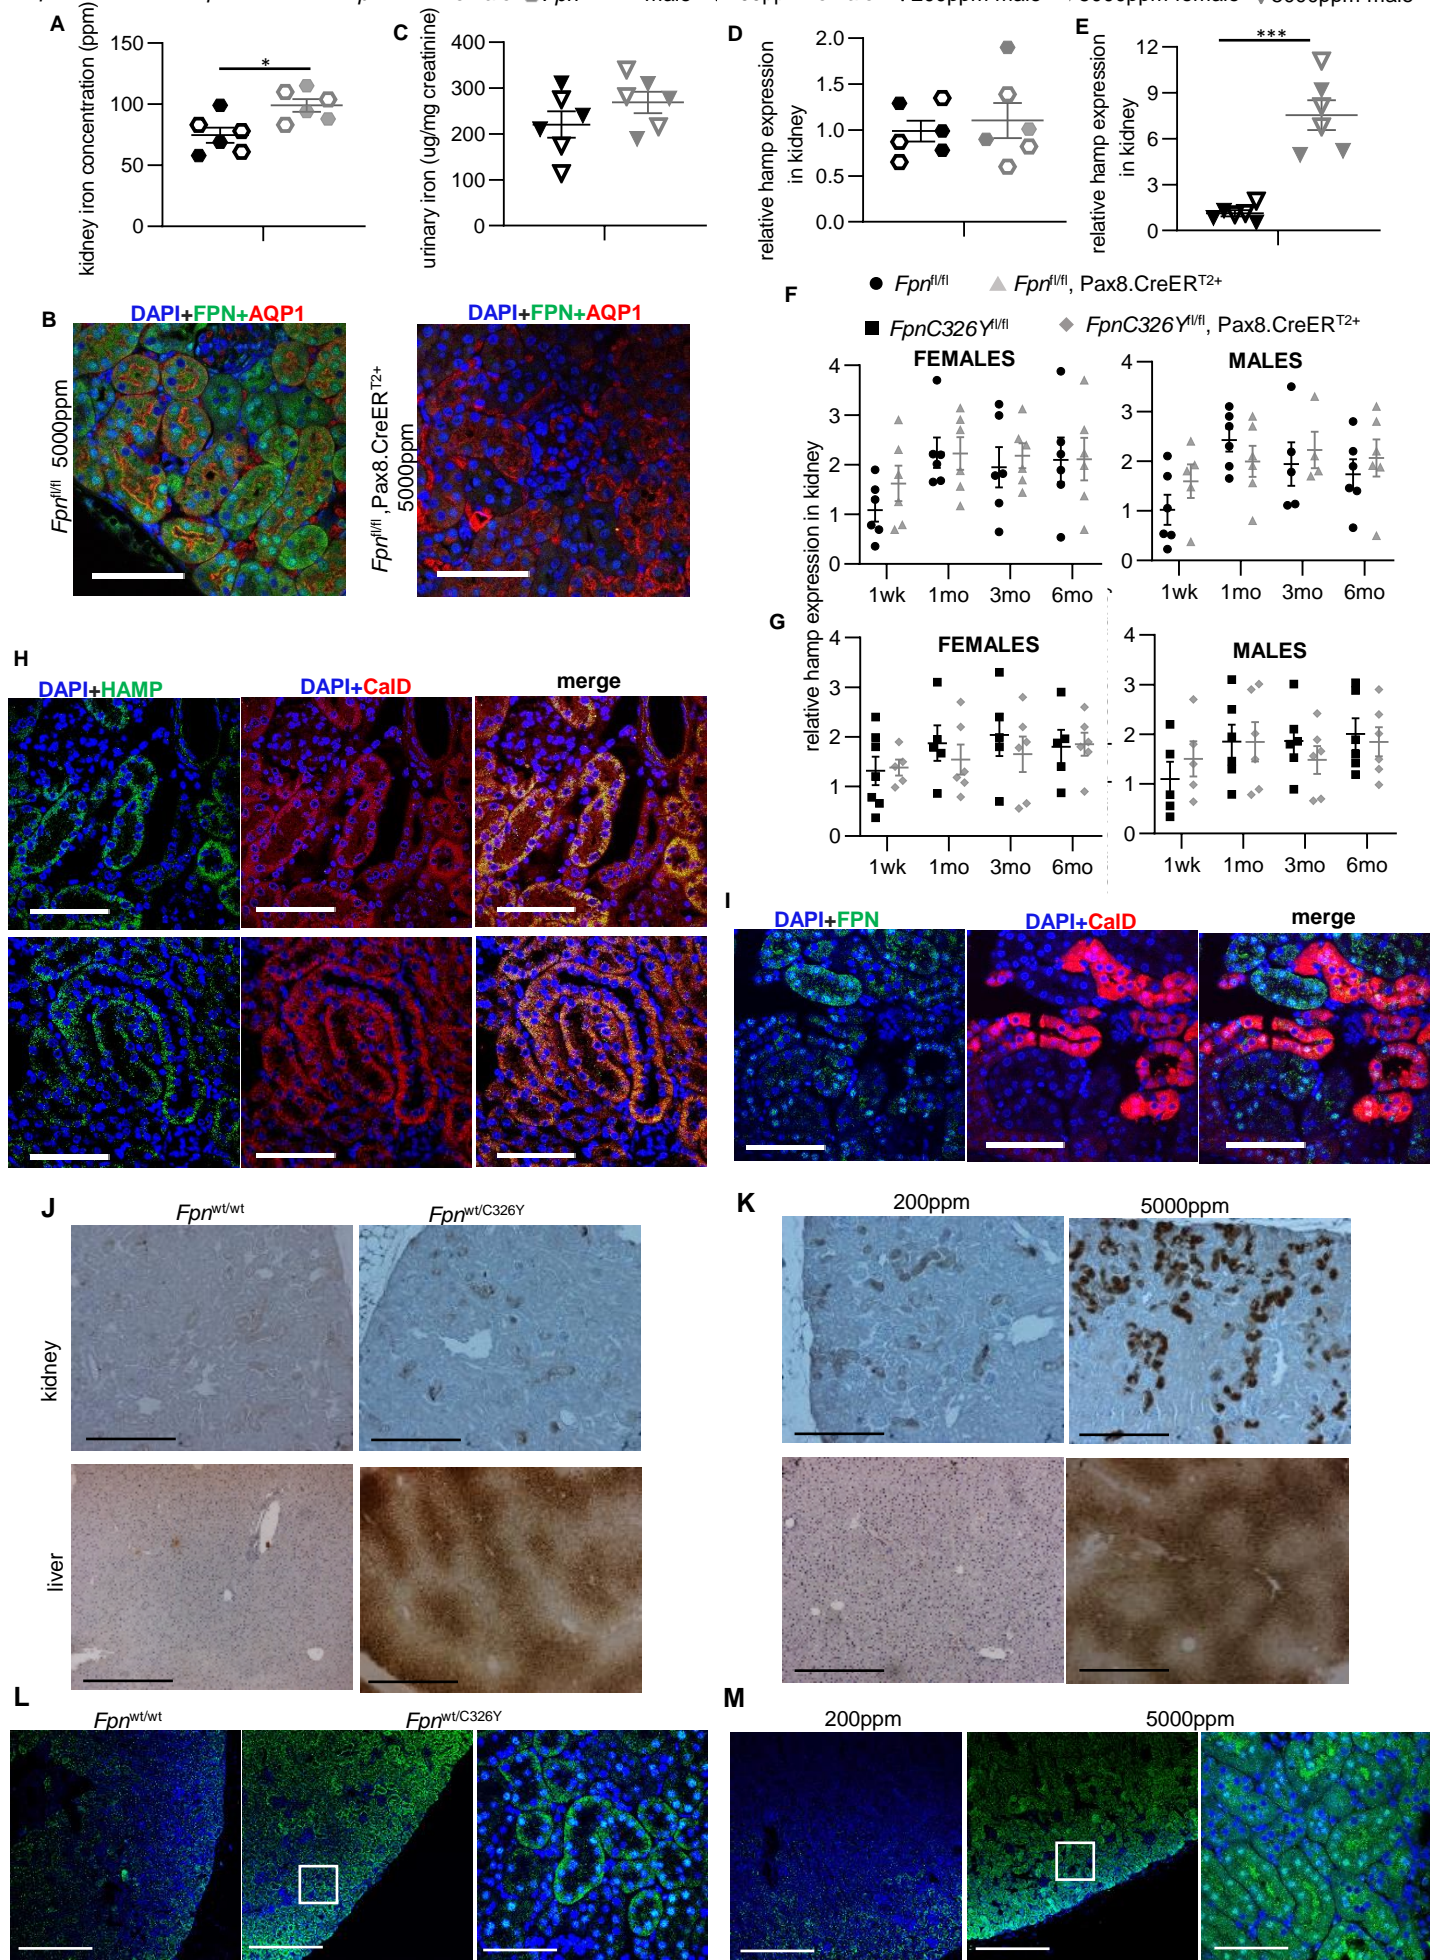

## Supplemental figure 5- Renal iron handling and renal *hamp* expression in the different mouse models

- A. Renal iron levels in *Fpn*<sup>wt/C326Y</sup> animals and *Fpn*<sup>wt/wt</sup> controls at 6 months of age.
- B. Representative images of FPN and AQP1 immuno-fluorescent staining in the renal cortex of *Fpn*<sup>fl/fl</sup>, Pax8.CreER<sup>T2+</sup> animals and *Fpn*<sup>fl/fl</sup> controls fed an iron-loaded diet containing 5000ppm from weaning for 3 months. Scale bar=25µm, original magnification x60.
- C. Urinary iron levels (normalised to urinary Creatinine) in wild type animals fed an iron-loaded diet containing 5000ppm iron, or a control diet containing 200ppm iron from weaning for 3 months.
- D. Renal *hamp* gene expression in *Fpn*<sup>wt/C326Y</sup> animals and *Fpn*<sup>wt/wt</sup> controls at 3 months of age.
- E. Renal *hamp* gene expression in wild type animals fed an iron-loaded diet containing 5000ppm iron, or a control diet containing 200ppm iron from weaning for 3 months.
- F. Renal *hamp* gene expression in female and male *Fpn*<sup>C326Y/fl/fl</sup>, Pax8.CreER<sup>T2+</sup> mice and *Fpn*<sup>C326Y/fl/fl</sup> controls at 1 week, 1 month, 3 months and 6 months post-tamoxifen treatment.
- G. Renal *hamp* gene expression in female and male *Fpn*<sup>fl/fl</sup>, Pax8.CreER<sup>T2+</sup> mice and *Fpn*<sup>fl/fl</sup> controls at 1 week, 1 month, 3 months and 6 months post-tamoxifen induction.
- H. Representative images of HAMP and CalD immuno-fluorescent staining in the renal cortex of wild type animals at 3 months of age. Scale bar=25µm, original magnification x60.
- I. Representative images of FPN and CalD immuno-fluorescent staining in the renal cortex of *Fpn*<sup>C326Y/fl/fl</sup>, Pax8.CreER<sup>T2+</sup> animals at 1 months of age. Scale bar=25µm, original magnification x60
- J-M. Larger versions of panels Fig4C, 4D, 4F and 4G respectively.

Values are shown as mean± standard error of the mean. \*p<0.05.

## Supplemental Figure 6

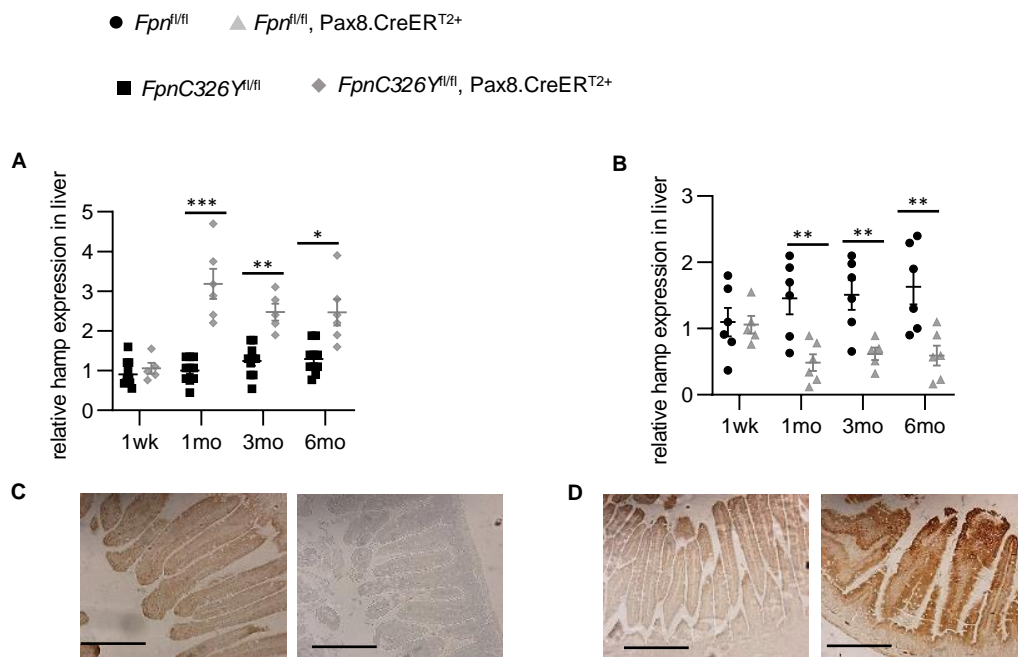

### Supplemental figure 6- Liver *hamp* gene expression and gut FPN levels are altered in mice with renal tubule-specific knockout of *fpn* and in mice with renal tubule-specific knock-in of *fpnC326Y*.

- A. Relative expression of *hamp* mRNA in livers of female *FpnC326Y<sup>fl/fl</sup>, Pax8.CreERT<sup>2+</sup>* mice and *FpnC326Y<sup>fl/fl</sup>* controls at 1 week, 1 month, 3 months and 6 months post tamoxifen treatment.
- B. Relative expression of *hamp* mRNA in livers of female *Fpn<sup>fl/fl</sup>, Pax8.CreERT<sup>2+</sup>* mice and *Fpn<sup>fl/fl</sup>* controls at 1 week, 1 month, 3 months and 6 months post tamoxifen treatment.
- C. Representative images of FPN immuno-staining in the gut of female *FpnC326Y<sup>fl/fl</sup>, Pax8.CreERT<sup>2+</sup>* mice and *FpnC326Y<sup>fl/fl</sup>* controls 1 month post tamoxifen treatment. Scale bar=200µm, original magnification x10.
- D. Representative images of FPN immune-staining in the gut of female *Fpn<sup>fl/fl</sup>, Pax8.CreERT<sup>2+</sup>* mice and *Fpn<sup>fl/fl</sup>* controls 1 month post tamoxifen treatment. Scale bar=200µm, original magnification x10.

Values are shown as mean± standard error of the mean. \*p<0.05, \*\*p<0.01, \*\*\*p<0.001.
